# Supplementary material for: Optimization and validation of liquid–liquid extraction with low-temperature purification (LLE-LTP) for determining fluopyram fungicide in water samples using HPLC-DAD
Source: Royal Society of Chemistry journal article supplement (doi:10.1039/d2ay01004f), 2022-01-01
Supplement: d2ay01004f1.pdf [file d2ay01004f1.pdf]

*Analytical Methods*

**Electronic Supplementary Information – ESI †**

**Optimization and validation of liquid-liquid extraction with low-temperature purification (LLE-LTP) for determining fluopyram fungicide in water samples using HPLC-DAD**

Lucas Victor Pereira de Freitas (Orcid 0000-0001-7183-9362),<sup>a</sup> Gleysson de Paula Terra,<sup>b</sup> Silas de Souza Santos,<sup>c</sup> Lázaro Chaves Sicupira (Orcid 0000-0002-4085-2959),<sup>d</sup> Flaviano Oliveira Silvério (Orcid: 0000-0002-5753-8739)<sup>c\*</sup>

<sup>a</sup> School of Pharmaceutical Sciences of Ribeirão Preto, Universidade de São Paulo, 14040-903, Ribeirão Preto, São Paulo, Brazil

<sup>b</sup> Department of Chemistry, Universidade Federal dos Vales do Jequitinhonha e Mucuri, Diamantina, Minas Gerais, Brazil

<sup>c</sup> Institute of Agricultural Sciences, Universidade Federal de Minas Gerais, 39404-547, Montes Claros, Minas Gerais, Brazil

<sup>d</sup> Institute of Engineering, Science and Technology, Universidade Federal dos Vales do Jequitinhonha e Mucuri, 39447-790, Janaúba, Minas Gerais, Brazil

---

\* Corresponding Author  
E-mail: flavianosilverio@ufmg.br  
<https://orcid.org/0000-0002-5753-8739>

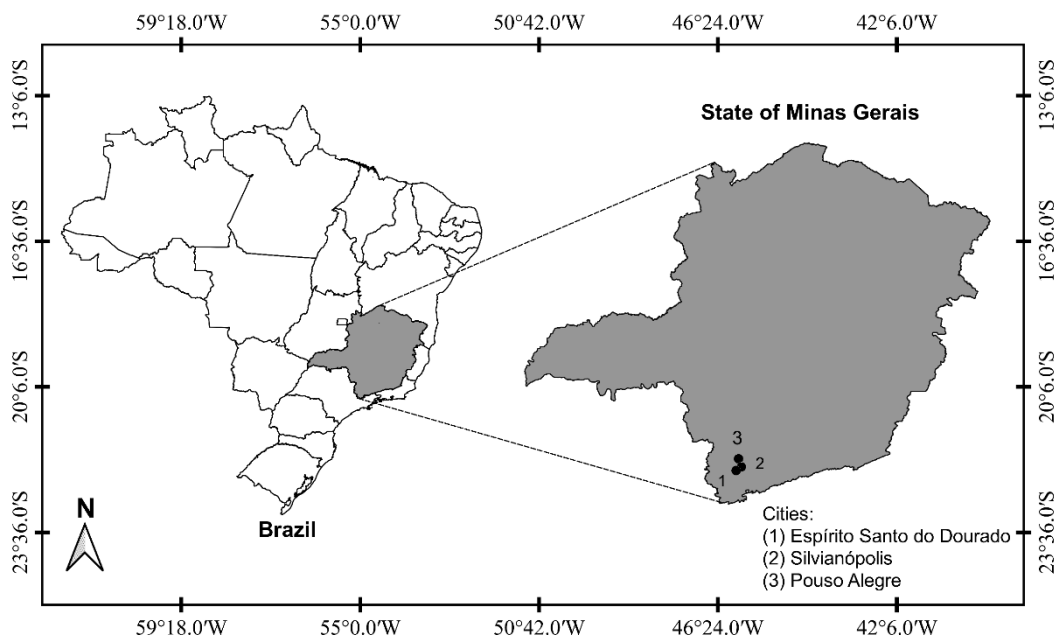

**Fig. S1** Map showing the location of the three Brazilian cities where the water samples were collected.

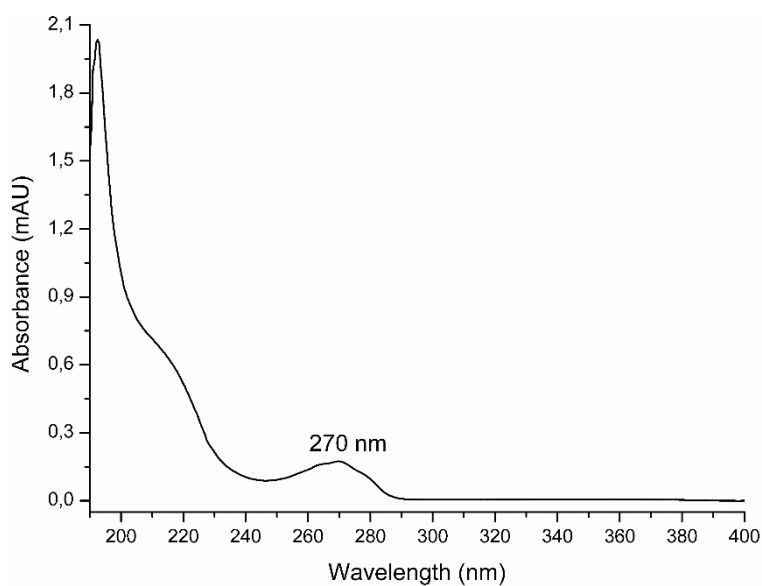

**Fig. S2** Absorption spectrum in the ultraviolet and visible region of the fluopyram standard solution at  $1.0 \text{ mg L}^{-1}$  in acetonitrile.

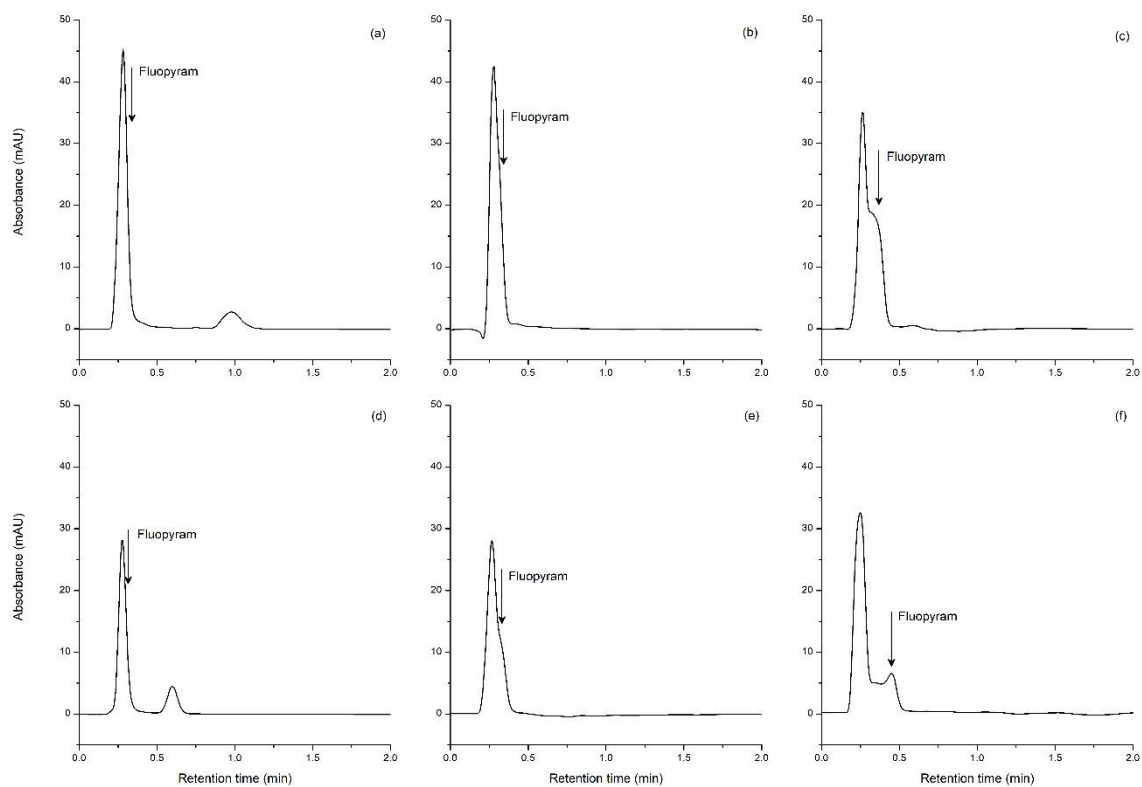

**Fig. S3** Chromatograms of the fluopyram standard solution at  $1.0 \text{ mg L}^{-1}$  in acetonitrile. Zorbax column (2.1 mm x 50 mm,  $1.8 \mu\text{m}$ ); column temperature =  $30 \text{ }^\circ\text{C}$ ;  $\lambda = 270 \text{ nm}$ ; flow rate =  $0.5 \text{ mL min}^{-1}$ ; mobile phase (a) ACN:H<sub>2</sub>O (100:0 v/v), (b) ACN:H<sub>2</sub>O (90:10 v/v), (c) ACN:H<sub>2</sub>O (80:20 v/v), (d) MeOH:H<sub>2</sub>O (100:0 v/v), (e) MeOH:H<sub>2</sub>O (90:10 v/v), and (f) MeOH:H<sub>2</sub>O (80:20 v/v). The arrows in the figure indicate the retention time of the fluopyram.

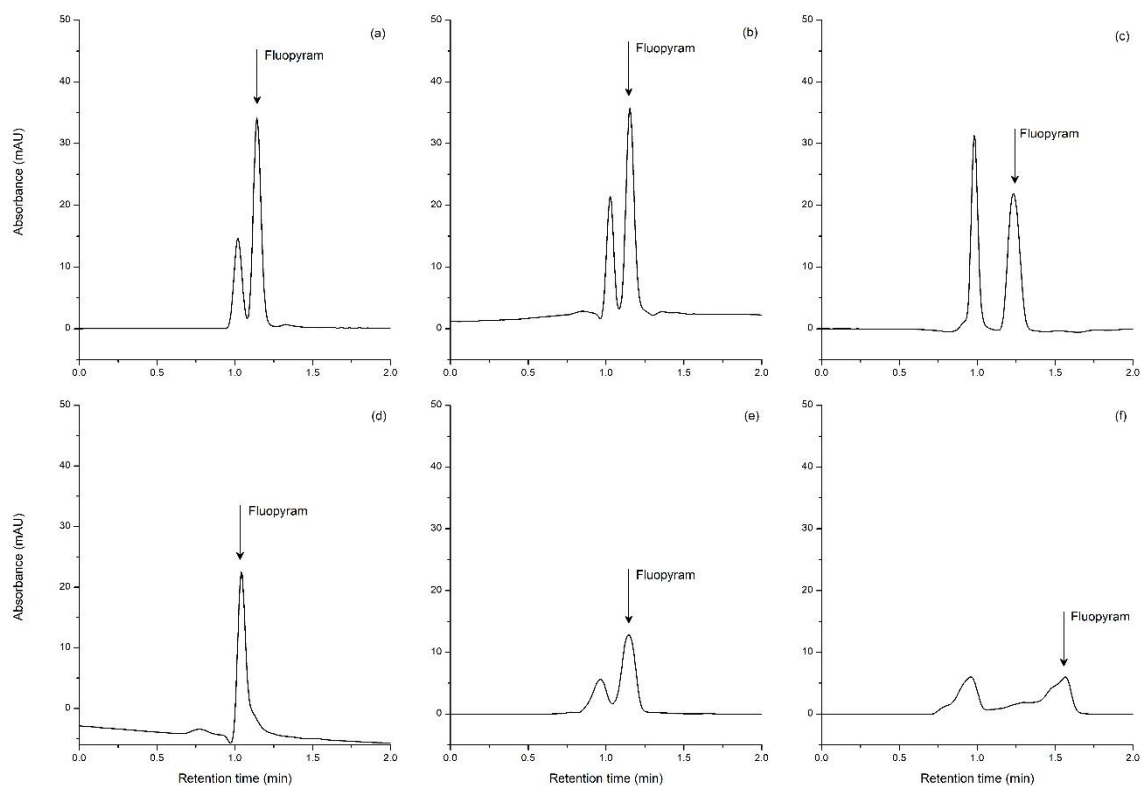

**Fig. S4** Chromatograms of the fluopyram standard solution at  $1.0 \text{ mg L}^{-1}$  in Acetonitrile. Poroshell column (4.6 mm x 50 mm, 2.7  $\mu\text{m}$ , Agilent Technologies); column temperature =  $30 \text{ }^\circ\text{C}$ ;  $\lambda = 270 \text{ nm}$ ; flow rate =  $0.5 \text{ mL min}^{-1}$ ; mobile phase (a) ACN:H<sub>2</sub>O (100:0 v/v), (b) ACN:H<sub>2</sub>O (90:10 v/v), (c) ACN:H<sub>2</sub>O (80:20 v/v), (d) MeOH:H<sub>2</sub>O (100:0 v/v), (e) MeOH:H<sub>2</sub>O (90:10 v/v), and (f) MeOH:H<sub>2</sub>O (80:20 v/v). The arrows in the figure indicate the retention time of the fluopyram.

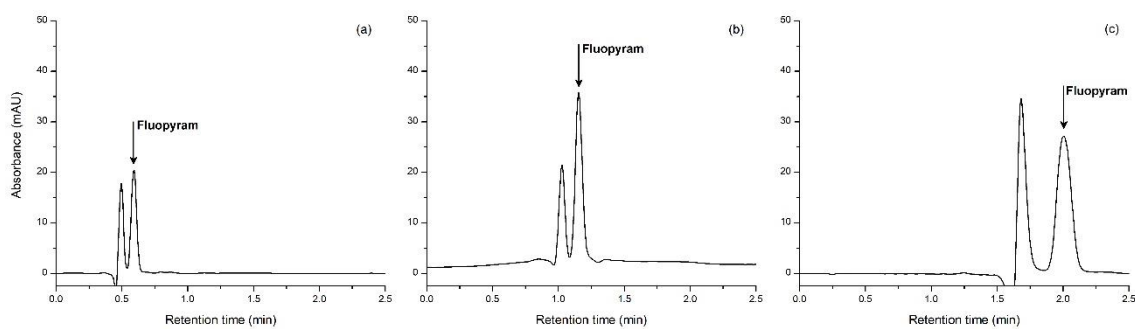

**Fig. S5** Chromatograms of the fluopyram standard solution at  $1.0 \text{ mg L}^{-1}$  in Acetonitrile. Poroshell column (4.6 mm x 50 mm,  $2.7 \mu\text{m}$ , Agilent Technologies),  $\lambda = 270 \text{ nm}$ ; column temperature =  $30 \text{ }^\circ\text{C}$ ; mobile phase ACN:H<sub>2</sub>O (90:10 v/v); flow rate (a)  $1.0 \text{ mL min}^{-1}$ , (b)  $0.5 \text{ mL min}^{-1}$ , and (c)  $0.3 \text{ mL min}^{-1}$ .

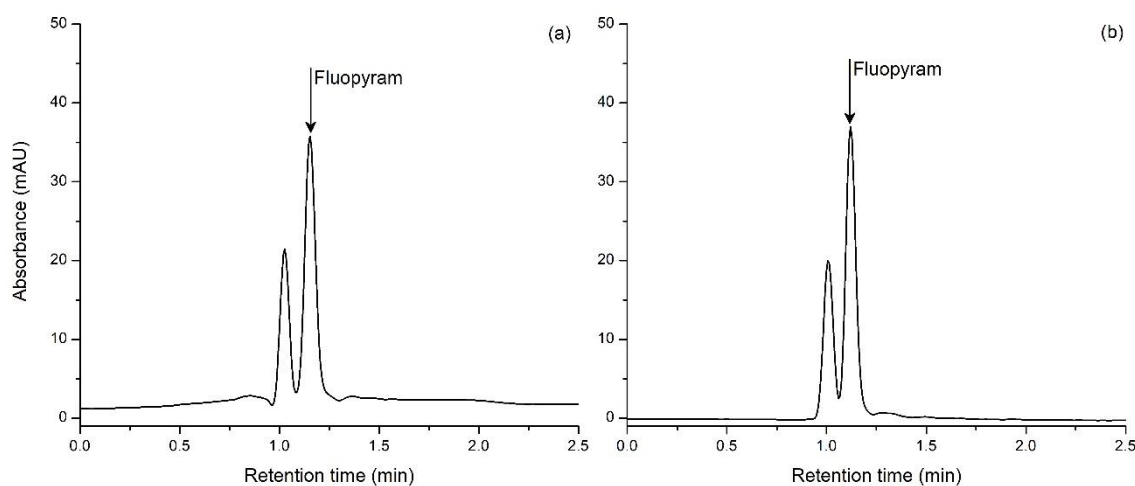

**Fig. S6** Chromatograms of the fluopyram standard solution at  $1.0 \text{ mg L}^{-1}$  in Acetonitrile. Poroshell column (4.6 mm x 50 mm,  $2.7 \mu\text{m}$ , Agilent Technologies),  $\lambda = 270 \text{ nm}$ ; mobile phase ACN:H<sub>2</sub>O (90:10 v/v); flow rate =  $0.5 \text{ mL min}^{-1}$ ; column temperature (a)  $30 \text{ }^\circ\text{C}$ , and (b)  $40 \text{ }^\circ\text{C}$ .

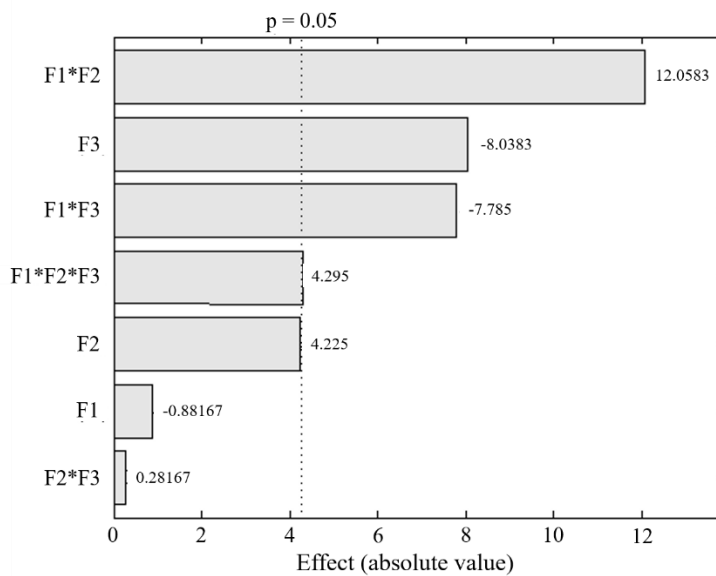

**Fig. S7** Pareto chart of the effects and their interaction in the LLE-LTP of fluopyram at a probability level of 95% ( $p \leq 0.05$ ).

F1, factor 1 (extraction phase: proportion of ACN:EtOAc); F2, factor 2 (ionic strength); F3, factor 3 (sample freezing time).

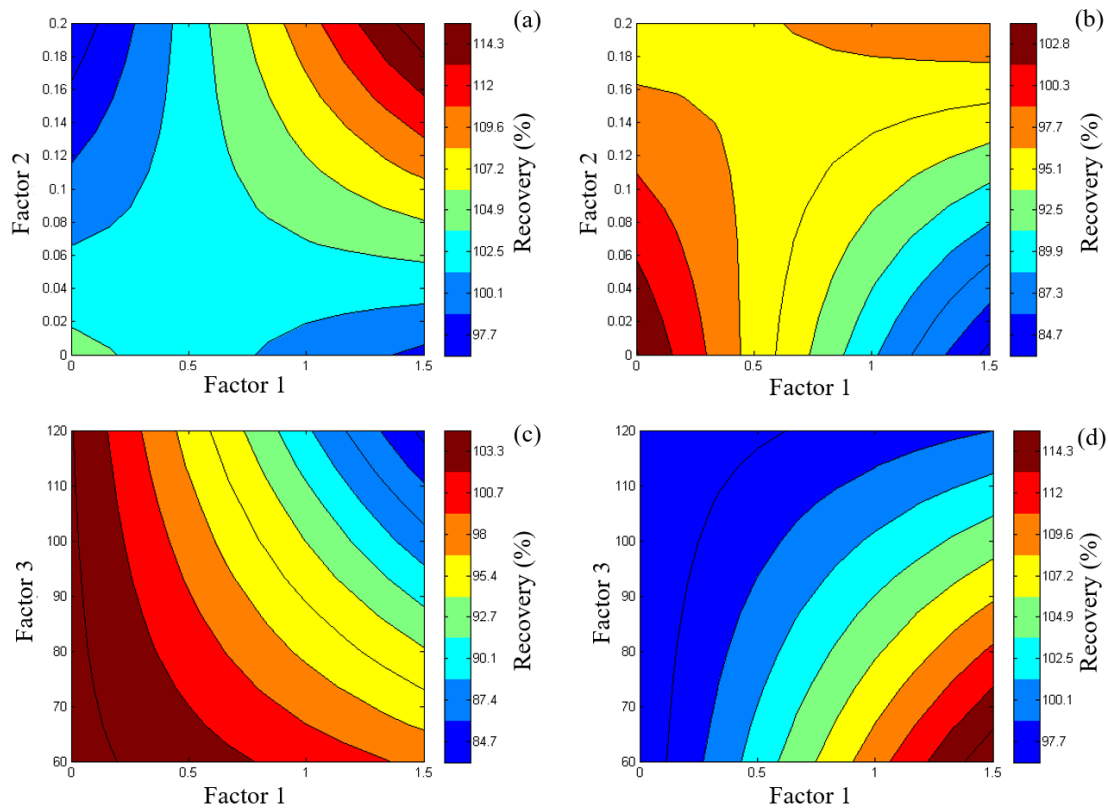

**Fig. S8** Response surface plots for interactive effects between the extraction phase (factor 1) and ionic strength (factor 2) at the time of (a) 60 min and (b) 120 min; and the interactive effects between the extraction phase (factor 1) and the sample freezing time (factor 3) with the ionic strength at (c) level (+) and (d) level (-).

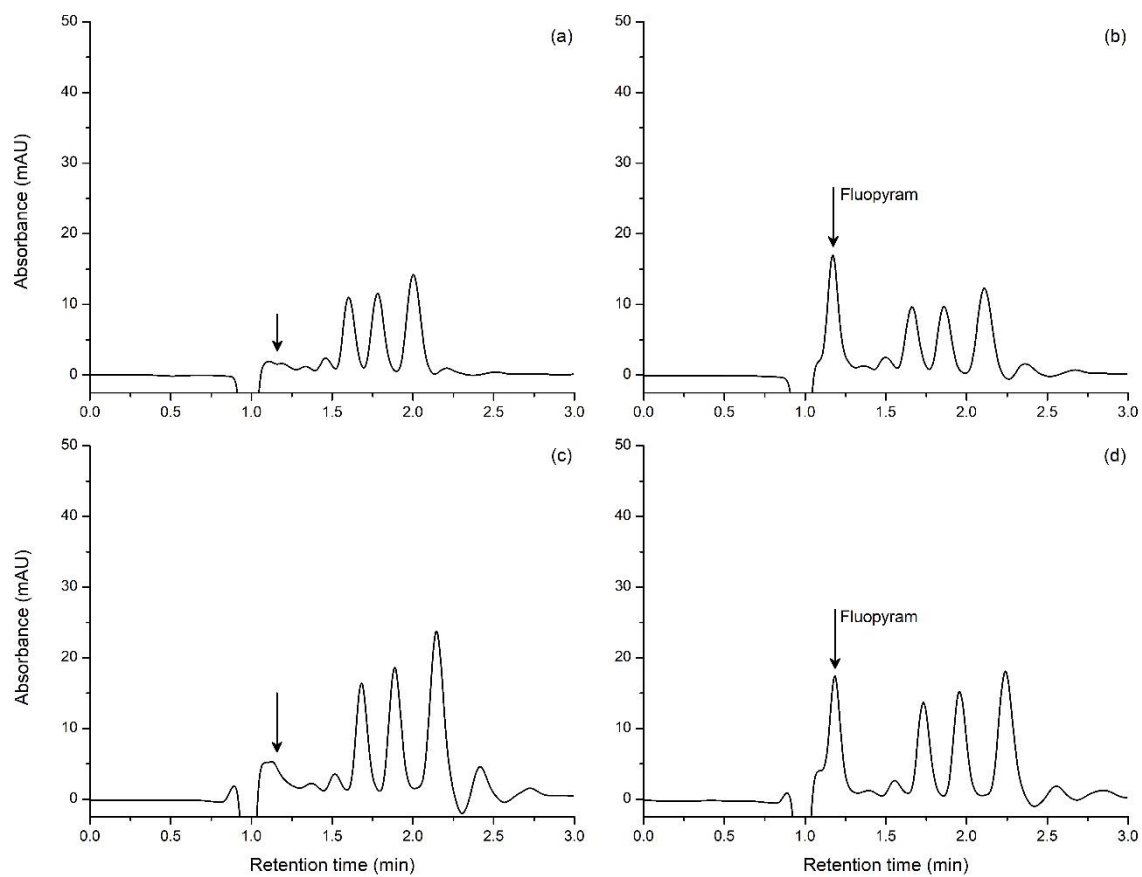

**Fig. S9** Chromatograms of (a) the blank extract and (b) the fortified matrix extract obtained using the extraction phase composed by acetonitrile; and chromatograms of (c) the blank extract and (d) the fortified matrix extract obtained using the extraction phase composed by EtOAc.



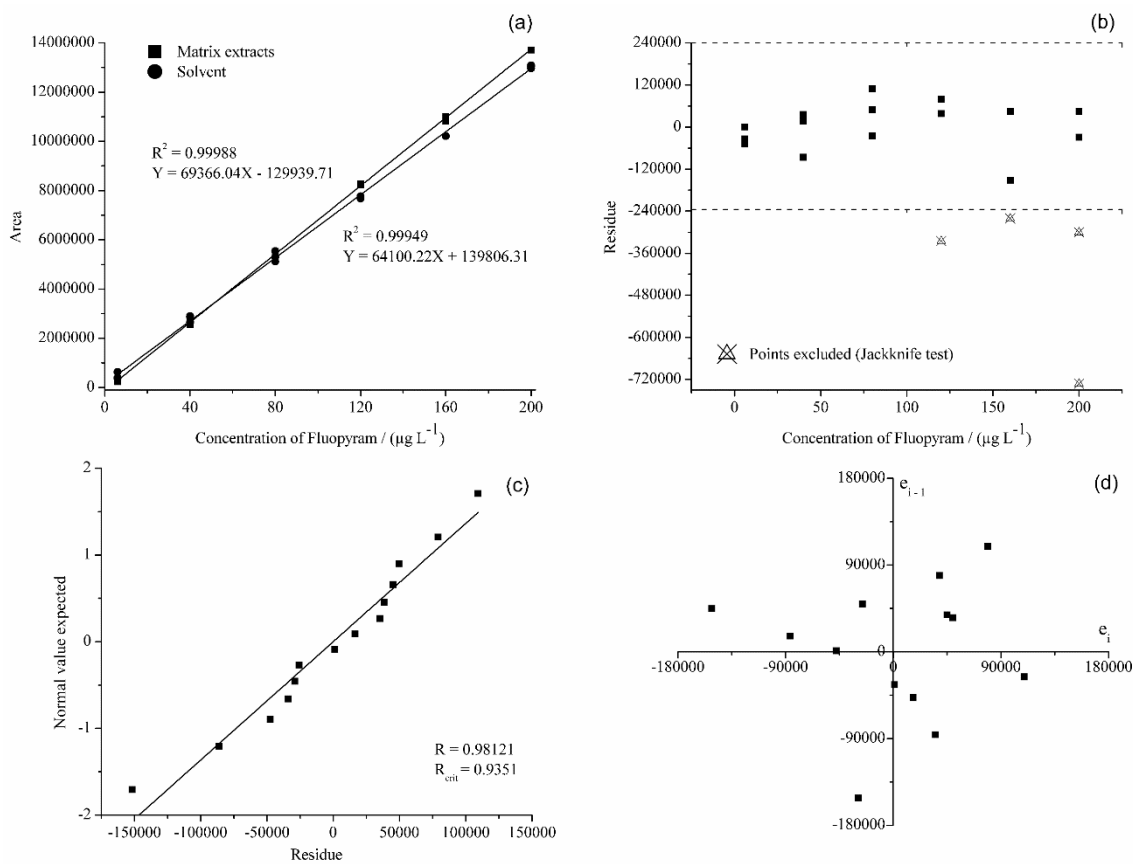

**Fig. S10** (a) analytical curves of fluopyram solutions in solvent and matrix extracts; (b) linear regression residues after the exclusion of the outliers (Jackknife test); (c) normal probability of regression residues (Ryan-Joiner test); (d) autocorrelation of regression residues (Durbin-Watson test).

$e_i$ , residue;  $R^2$ , determination coefficient;  $R$ , correlation coefficient of Ryan-Joiner test;  $d$ , Durbin-Watson statistics

**Table S1** ANOVA for the significance of regression and deviation from linearity

|                   | Regression             | Deviation from linearity |
|-------------------|------------------------|--------------------------|
| n                 | 14                     | 14                       |
| F <sub>crit</sub> | 4.75                   | 3.84                     |
| F                 | 4.88 x 10 <sup>4</sup> | 1.12                     |

n, number of observations; F<sub>crit</sub>, F critical; F, ratio between variances
